# Supplementary material for: The Effect of Ventilation with Individualized Positive End-Expiratory Pressure on Postoperative Atelectasis in Patients Undergoing Robot-Assisted Radical Prostatectomy: A Randomized Controlled Trial
Source: PubMed Central journal article supplement (PMC7922101; doi:10.3390/jcm10040850), 2021-02-19
Supplement: jcm-10-00850-s001.pdf [file jcm-10-00850-s001.pdf]

# Supplementary Material

**Supplementary Table S1.** Comparison of ventilator-related parameters and intraoperative arterial blood gas analysis between the individualized and standardized groups.

| Characteristic                                | Individualized Group<br>(n = 30) |                     |                     |                     | Standardized Group<br>(n = 30) |                      |                     |                     | p-Value |        |        |       |
|-----------------------------------------------|----------------------------------|---------------------|---------------------|---------------------|--------------------------------|----------------------|---------------------|---------------------|---------|--------|--------|-------|
|                                               | T1                               | T2                  | T3                  | T4                  | T1                             | T2                   | T3                  | T4                  | T1      | T2     | T3     | T4    |
| Tidal volume, mL                              | 378.5 ± 35.0                     | 389.1 ± 29.0        | 389.6 ± 31.0        | 386.1 ± 32.5        | 379.7 ± 39.1                   | 392.5 ± 42.3         | 386.9 ± 42.0        | 380.0 ± 38.6        | 0.898   | 0.713  | 0.781  | 0.511 |
| PEEP, cm H <sub>2</sub> O                     | 7<br>(7.0–7.0)                   | 14.0<br>(12.0–18.0) | 14.0<br>(12.0–18.0) | 7<br>(7.0–7.0)      | 7<br>(7.0–7.0)                 | 7<br>(7.0–7.0)       | 7<br>(7.0–7.0)      | 7<br>(7.0–7.0)      | NA      | <0.001 | <0.001 | NA    |
| PIP, cm H <sub>2</sub> O                      | 16.1 ± 2.3                       | 32.4 ± 4.0          | 32.7 ± 3.8          | 17.4 ± 1.9          | 15.3 ± 2.0                     | 26.4 ± 3.8           | 27.7 ± 3.3          | 16.8 ± 2.1          | 0.133   | <0.001 | <0.001 | 0.256 |
| Pplt, cm H <sub>2</sub> O                     | 13.5<br>(13.0–14.0)              | 28.5<br>(26.0–33.0) | 29.0<br>(27.5–32.5) | 15.0<br>(14.0–16.0) | 14.0<br>(13.0–15.5)            | 25.0<br>(22.5–p26.5) | 26.0<br>(24.0–27.0) | 15.0<br>(14.0–16.0) | 0.197   | <0.001 | <0.001 | 0.754 |
| Dynamic compliance,<br>mL/cm H <sub>2</sub> O | 43.5 ± 10.0                      | 22.6 ± 4.0          | 22.3 ± 4.3          | 38.3 ± 7.0          | 47.6 ± 9.8                     | 20.9 ± 3.9           | 19.1 ± 3.5          | 40.4 ± 8.8          | 0.110   | 0.086  | 0.003  | 0.312 |
| Static compliance, mL/cm<br>H <sub>2</sub> O  | 58.9 ± 14.5                      | 26.6 ± 5.7          | 25.8 ± 4.8          | 49.8 ± 8.5          | 52.6 ± 12.1                    | 21.5 ± 3.6           | 19.9 ± 3.4          | 47.2 ± 11.3         | 0.130   | 0.001  | <0.001 | 0.402 |
| Driving pressure, cm H <sub>2</sub> O         | 6.5<br>(6.0–7.0)                 | 15.0<br>(13.0–17.5) | 15.0<br>(13.0–17.5) | 8.0<br>(7.0–9.0)    | 7.0<br>(6.0–8.5)               | 18.0<br>(15.5–19.5)  | 19.0<br>(17.0–20.0) | 8.0<br>(7.0–9.0)    | 0.197   | 0.004  | <0.001 | 0.754 |
| PaO <sub>2</sub> /FiO <sub>2</sub>            | 503.7 ± 136.8                    | 363.2 ± 82.8        | 369.8 ± 77.5        | 429.2 ± 91.4        | 504.5 ± 197.0                  | 321.5 ± 114.1        | 341.6 ± 108.5       | 356.5 ± 100.7       | 0.985   | 0.111  | 0.252  | 0.005 |
| PaCO <sub>2</sub> , mmHg                      | 43.1 ± 3.9                       | 42.0<br>(40.0–44.0) | 48.5<br>(44.0–52.0) | 46.2 ± 6.1          | 42.9 ± 4.1                     | 44.0<br>(40.0–48.0)  | 47.5<br>(44.0–52.0) | 49.1 ± 6.8          | 0.873   | 0.041  | 0.941  | 0.087 |
| pH                                            | 7.42<br>(7.41–7.43)              | 7.42 ± 0.04         | 7.37 ± 0.04         | 7.39<br>(7.36–7.43) | 7.41<br>(7.39–7.44)            | 7.40 ± 0.04          | 7.36 ± 0.05         | 7.36<br>(7.33–7.39) | 0.498   | 0.021  | 0.372  | 0.032 |

|                                        |                     |                     |                     |                 |                     |                     |                     |                |       |       |       |       |
|----------------------------------------|---------------------|---------------------|---------------------|-----------------|---------------------|---------------------|---------------------|----------------|-------|-------|-------|-------|
| HCO <sub>3</sub> <sup>-</sup> , mmol/L | 27.9<br>(27.2–28.5) | 27.5<br>(26.6–28.5) | 27.8<br>(26.6–28.5) | 27.4 ± 1.9      | 27.6<br>(26.6–28.5) | 27.2<br>(26.0–28.2) | 27.2<br>(26.3–28.2) | 27.5 ± 1.4     | 0.170 | 0.371 | 0.143 | 0.875 |
| SaO <sub>2</sub> , %                   | 100<br>(99–100)     | 99<br>(99–100)      | 99<br>(99–100)      | 100<br>(99–100) | 100<br>(99–100)     | 99<br>(98–99)       | 99<br>(98–100)      | 99<br>(98–100) | 0.323 | 0.042 | 0.256 | 0.173 |

Values are reported as mean ± SD or median (interquartile range). PEEP = positive end-expiratory pressure; PIP = peak inspiratory pressure, Pplt = plateau pressure. Plateau pressures were measured only in 44 patients (24 patients in individualized group and 20 patients in standardized group). T1= after anesthesia induction, T2 = after achieving the pneumoperitoneum under steep Trendelenburg position, T3 = 1 h after T2, and T4 = just before extubation in the operating room.
